# Supplementary material for: Drosophila Toll-9 is induced by aging and neurodegeneration to modulate stress signaling and its deficiency exacerbates tau-mediated neurodegeneration
Source: PubMed Central journal article supplement — iScience. 2023 Jan 13;26(2):105968. doi: 10.1016/j.isci.2023.105968 (PMC9883205; doi:10.1016/j.isci.2023.105968), 2023-01-13
Supplement: mmc1.pdf [file mmc1.pdf]

**Supplemental information**

***Drosophila Toll-9* is induced by aging and neurodegeneration  
to modulate stress signaling and its deficiency  
exacerbates tau-mediated neurodegeneration**

**Yasufumi Sakakibara, Risa Yamashiro, Sachie Chikamatsu, Yu Hirota, Yoko Tsubokawa, Risa Nishijima, Kimi Takei, Michiko Sekiya, and Koichi M. Iijima**

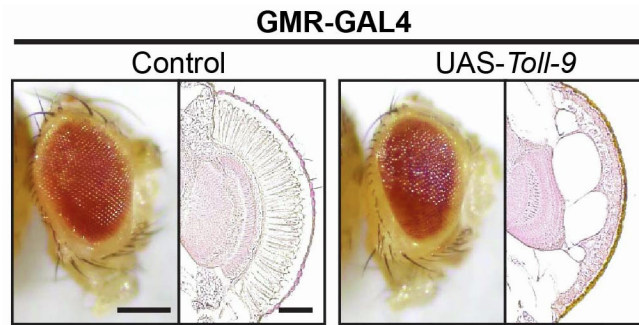

**Figure S1. Developmental overexpression of *Toll-9* by the GMR-GAL4 driver caused neurodegeneration in fly eyes, Related to Figure 3.**

Developmental overexpression of *Toll-9* by the GMR-GAL4 driver caused glazed eyes. Eyes of female flies carrying the GMR-GAL4 driver alone (Control) or carrying both the GMR-GAL4 driver and UAS-*Toll-9* are shown (left panel). The right panel shows the hemisphere in paraffin-embedded brain sections with HE staining. All scale bars represent 200  $\mu\text{m}$ .

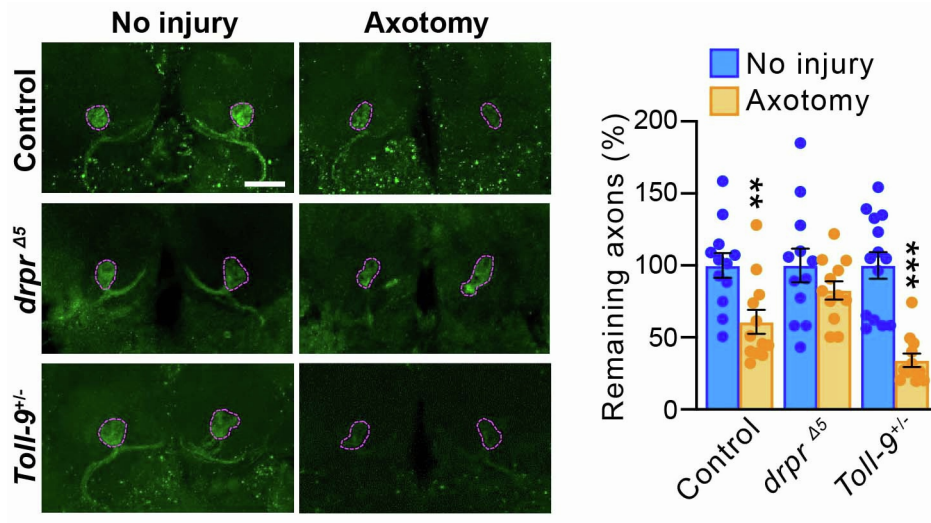

**Figure S2. *Toll-9* deficiency does not affect glial engulfment of degenerating neurons in fly brains, Related to Figure 4.**

Representative Z-stack projections of OR85e GFP+ axons (dotted line) from the groups with No injury or Axotomy of heterozygous KO of *Toll-9* (*Toll-9*<sup>+/-</sup>) and *drpr* null mutant flies (*drpr*<sup>Δ5</sup>) as a positive control are shown (left panels). Scale bars represent 25 μm. The right graph shows the percentages of GFP fluorescence normalized by the value of fluorescence intensity from the group with No injury. Mean ± SEM, n = 12–14 (Control: No injury n = 12, Axotomy n = 12; *Toll-9*<sup>+/-</sup> No injury n = 14, Axotomy n = 12; *drpr*<sup>Δ5</sup>: No injury n = 12, Axotomy n = 12); \*\**p* < 0.01 and \*\*\**p* < 0.001 by Welch's *t*-test vs. No injury.

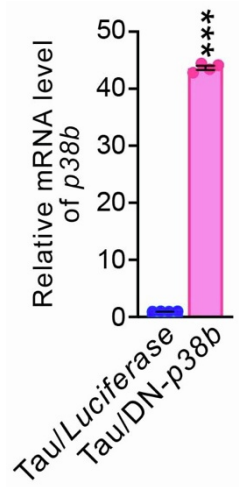

**Figure S3.** The mRNA expression levels of *p38b* in fly head expressing the dominant negative form of *p38b*, Related to Figure 6.

Overexpression of DN-*p38b* under the control of GMR-GAL4 driver significantly increased the mRNA level of *p38b* in fly heads. The mRNA levels of *p38b* in heads of flies carrying the GMR-GAL4 driver, UAS-human tau and UAS-*Luciferase* (Tau/*Luciferase*) or carrying the GMR-GAL4 driver, UAS-human tau and UAS-DN-*p38b* (Tau/DN-*p38b*) were analyzed by qRT-PCR. Mean  $\pm$  SEM, n = 4 (technical replicate); \*\*\* $p < 0.001$  by Student's *t*-test vs. Tau/*Luciferase*.

**Table S1. Genotype and age of flies used in this study, Related to STAR Methods.**

| Figure #                          | Label                                                                                                                      | Genotype                                                      | Age                                                  |
|-----------------------------------|----------------------------------------------------------------------------------------------------------------------------|---------------------------------------------------------------|------------------------------------------------------|
| Figure 1                          | Control (7-day-old, 40-day-old)<br>40-day-old Control                                                                      | +Y                                                            | Fig. 1A, B, C (described in figures), D, E, F (40d). |
|                                   | 40-day-old <i>Toll-9</i> KO                                                                                                | +Y;; <i>Toll-9</i> <sup>-</sup> / <i>Toll-9</i> <sup>-</sup>  | Fig. 1D, E, F (40d).                                 |
| Figure 2                          | Control (repo-GAL4)                                                                                                        | +Y;;repo-GAL4/+                                               | Fig. 2A (14d).                                       |
|                                   | <i>Toll-9</i> RNAi #1 (repo-GAL4)                                                                                          | +Y;;repo-GAL4/UAS- <i>Toll-9</i> RNAi                         | Fig. 2A (14d).                                       |
|                                   | <i>Toll-9</i> RNAi #2 (repo-GAL4)                                                                                          | +Y;;repo-GAL4/UAS- <i>Toll-9</i> RNAi                         | Fig. 2A (14d).                                       |
|                                   | 40-day-old Control                                                                                                         | +Y;;repo-GAL4/UAS-mCherry RNAi                                | Fig. 2B, C, D (40d).                                 |
|                                   | 40-day-old repo-GAL4> <i>Toll-9</i> RNAi #1                                                                                | +Y;;repo-GAL4/UAS- <i>Toll-9</i> RNAi                         | Fig. 2B, C, D (40d).                                 |
|                                   | 40-day-old repo-GAL4> <i>Toll-9</i> RNAi #2                                                                                | +Y;;repo-GAL4/UAS- <i>Toll-9</i> RNAi                         | Fig. 2B, C, D (40d).                                 |
| Figure 3                          | Control (Male)                                                                                                             | +Y                                                            | Fig. 3A (described in figures).                      |
|                                   | <i>Toll-9</i> KO (Male)                                                                                                    | +Y;; <i>Toll-9</i> <sup>-</sup> / <i>Toll-9</i> <sup>-</sup>  | Fig. 3A (described in figures).                      |
|                                   | Control (Female)                                                                                                           | +/+                                                           | Fig. 3A (described in figures).                      |
|                                   | <i>Toll-9</i> KO (Female)                                                                                                  | +/+;; <i>Toll-9</i> <sup>-</sup> / <i>Toll-9</i> <sup>-</sup> | Fig. 3A (described in figures).                      |
|                                   | Control, Control 1% H <sub>2</sub> O <sub>2</sub> ,<br>Control 5% H <sub>2</sub> O <sub>2</sub>                            | +Y                                                            | Fig. 3B (described in figures).                      |
|                                   | <i>Toll-9</i> KO, <i>Toll-9</i> KO 1%<br>H <sub>2</sub> O <sub>2</sub> , <i>Toll-9</i> KO 5% H <sub>2</sub> O <sub>2</sub> | +Y;; <i>Toll-9</i> <sup>-</sup> / <i>Toll-9</i> <sup>-</sup>  | Fig. 3B (described in figures).                      |
|                                   | Control (female)                                                                                                           | +/+                                                           | Fig. 3C (55d).                                       |
|                                   | <i>Toll-9</i> KO (female)                                                                                                  | +/+;; <i>Toll-9</i> <sup>-</sup> / <i>Toll-9</i> <sup>-</sup> | Fig. 3C (55d).                                       |
|                                   | Control (male)                                                                                                             | +Y                                                            | Fig. 3C (55d).                                       |
|                                   | <i>Toll-9</i> KO (male)                                                                                                    | +Y;; <i>Toll-9</i> <sup>-</sup> / <i>Toll-9</i> <sup>-</sup>  | Fig. 3C (55d).                                       |
|                                   | Control (repo-GAL4)                                                                                                        | +Y;;repo-GAL4/+                                               | Fig. 3D (50d).                                       |
|                                   | <i>Toll-9</i> RNAi #2 (repo-GAL4)                                                                                          | +Y;;repo-GAL4/UAS- <i>Toll-9</i> RNAi                         | Fig. 3D (50d).                                       |
|                                   | Control (Rh1-GAL4)                                                                                                         | Rh1-GAL4/+                                                    | Fig. 3E (60d).                                       |
|                                   | UAS- <i>Toll-9</i> (Rh1-GAL4)                                                                                              | Rh1-GAL4/+;UAS- <i>Toll-9</i> /+                              | Fig. 3E (60d).                                       |
|                                   | RU (-), RU (+) (GeneSwitch<br>GMR-GAL4; UAS- <i>Toll-9</i> )                                                               | GeneSwitch GMR-GAL4/Y;UAS- <i>Toll-9</i> /+                   | Fig. 3F (30d), G (55d).                              |
|                                   | Figure 4                                                                                                                   | Control (No injury, Axotomy)                                  | +Y                                                   |
| <i>Toll-9</i> KO                  |                                                                                                                            | +Y;; <i>Toll-9</i> <sup>-</sup> / <i>Toll-9</i> <sup>-</sup>  | Fig. 4C, D (7d).                                     |
| <i>mCherry</i> RNAi (repo-GAL4)   |                                                                                                                            | repo-GAL4/Y;Or85e-mCD8::GFP/+;<br>UAS- <i>mCherry</i> RNAi/+  | Fig. 4E (7d).                                        |
| <i>Toll-9</i> RNAi #1 (repo-GAL4) |                                                                                                                            | repo-GAL4/Y;Or85e-mCD8::GFP/+;<br>UAS- <i>Toll-9</i> RNAi/+   | Fig. 4E (7d).                                        |
| <i>Toll-9</i> RNAi #2 (repo-GAL4) |                                                                                                                            | repo-GAL4/Y;Or85e-mCD8::GFP/+;<br>UAS- <i>Toll-9</i> RNAi/+   | Fig. 4E (7d).                                        |
| UAS- <i>Toll-9</i> (repo-GAL4)    |                                                                                                                            | repo-GAL4/Y;Or85e-mCD8::GFP/UAS- <i>Toll-9</i>                | Fig. 4E (7d).                                        |

|           |                                   |                                                             |                                 |
|-----------|-----------------------------------|-------------------------------------------------------------|---------------------------------|
| Figure 5  | Tau                               | +/+;GMR-GAL4, UAS-tau/+                                     | Fig. 5A, C, D (7d).             |
|           | Tau/ <i>Toll-9</i> <sup>+/-</sup> | +/+;GMR-GAL4, UAS-tau/+;Toll9/+                             | Fig. 5A, C, D (7d).             |
|           | <i>mCherry</i> RNAi (GMR-Tau)     | +/+;GMR-GAL4, UAS-tau/+;UAS- <i>mCherry</i> RNAi/+          | Fig. 5B (7d).                   |
|           | <i>Toll-9</i> RNAi #2 (GMR-Tau)   | +/+;GMR-GAL4, UAS-tau/+;UAS- <i>Toll-9</i> RNAi/+           | Fig. 5B (7d).                   |
|           | <i>mCherry</i> RNAi (GMR-GAL4)    | +/+;GMR-GAL4/+;UAS- <i>mCherry</i> RNAi/+                   | Fig. 5B (7d).                   |
|           | <i>Toll-9</i> RNAi #2 (GMR-GAL4)  | +/+;GMR-GAL4/+;UAS- <i>Toll-9</i> RNAi/+                    | Fig. 5B (7d).                   |
| Figure 6  | <i>Luciferase</i> (GMR-Tau)       | +/+;GMR-GAL4, UAS-tau/+;UAS- <i>Luciferase</i> /+           | Fig. 6A (7d).                   |
|           | DN- <i>p38b</i> (GMR-Tau)         | UAS-DN- <i>p38b</i> /+;GMR-GAL4, UAS-tau/+                  | Fig. 6A (7d).                   |
|           | <i>Luciferase</i> (GMR-GAL4)      | +/+;GMR-GAL4/+;UAS- <i>Luciferase</i>                       | Fig. 6A (7d).                   |
|           | DN- <i>p38b</i> (GMR-GAL4)        | UAS-DN- <i>p38b</i> /+;GMR-GAL4/+                           | Fig. 6A (7d).                   |
|           | Tau/ <i>Luciferase</i>            | +/+;GMR-GAL4, UAS-tau/+;UAS- <i>Luciferase</i> /+           | Fig. 6B (7d).                   |
|           | Tau/DN- <i>p38b</i>               | UAS-DN- <i>p38b</i> /+;GMR-GAL4, UAS-tau/+                  | Fig. 6B (7d).                   |
| Figure S1 | Control (GMR-GAL4)                | +/+;GMR-GAL4/+                                              | Fig. S1 (Left: 20d, Right: 7d). |
|           | UAS- <i>Toll-9</i> (GMR-GAL4)     | +/+;GMR-GAL4/UAS- <i>Toll-9</i>                             | Fig. S1 (Left: 20d, Right: 7d). |
| Figure S2 | Control                           | +Y;Or85e-mCD8::GFP/+                                        | Fig. S2 (7d).                   |
|           | <i>drpr</i> <sup>Δ5</sup>         | +Y;Or85e-mCD8::GFP/+;drpr <sup>Δ5</sup> /drpr <sup>Δ5</sup> | Fig. S2 (7d).                   |
|           | <i>Toll-9</i> <sup>+/-</sup>      | +Y;Or85e-mCD8::GFP/+;Toll-9/+                               | Fig. S2 (7d).                   |
| Figure S3 | Tau/ <i>Luciferase</i>            | +/+;GMR-GAL4, UAS-tau/+;UAS- <i>Luciferase</i> /+           | Fig. S3 (7d).                   |
|           | Tau/DN- <i>p38b</i>               | UAS-DN- <i>p38b</i> /+;GMR-GAL4, UAS-tau/+                  | Fig. S3 (7d).                   |

**Table S2. Primer sequences for qRT-PCR, Related to STAR Methods.**

| <b>Name</b>                                 | <b>Sequence</b>                | <b>Product size</b> |
|---------------------------------------------|--------------------------------|---------------------|
| Gapdh1 ( <i>Drosophila</i> ), Forward       | 5'- GACGAAATCAAGGCTAAGGTCG -3' | 109 bp              |
| Gapdh1 ( <i>Drosophila</i> ), Reverse       | 5'- AATGGGTGTCGCTGAAGAAGTC -3' |                     |
| Toll-1/TI ( <i>Drosophila</i> ), Forward    | 5'-GTGAGGTGCGACAGGGTTCAG-3'    | 198 bp              |
| Toll-1/TI ( <i>Drosophila</i> ), Reverse    | 5'-TGAGACGGCGAGTGGTAAAC-3'     |                     |
| Toll-2/18w ( <i>Drosophila</i> ), Forward   | 5'-ATTGGCCACATTGAGGAGGG-3'     | 182 bp              |
| Toll-2/18w ( <i>Drosophila</i> ), Reverse   | 5'-GAACAGTTGCGGAAGGCTTG-3'     |                     |
| Toll-4 ( <i>Drosophila</i> ), Forward       | 5'-ATCTGTCAAGGGCTCAAGGC-3'     | 193 bp              |
| Toll-4 ( <i>Drosophila</i> ), Reverse       | 5'-CACCATGTACGCCCTCAACT-3'     |                     |
| Toll-5/Tehao ( <i>Drosophila</i> ), Forward | 5'-AAACTTCGCAGCCCCGAAAAC-3'    | 174 bp              |
| Toll-5/Tehao ( <i>Drosophila</i> ), Reverse | 5'-GCATATTTCCCGCAACGTC-3'      |                     |
| Toll-6 ( <i>Drosophila</i> ), Forward       | 5'-ATGGTCCACCGAATCCACC-3'      | 150 bp              |
| Toll-6 ( <i>Drosophila</i> ), Reverse       | 5'-GCCTCCTCAGAGTGCCAAAT-3'     |                     |
| Toll-7 ( <i>Drosophila</i> ), Forward       | 5'-CAGCGAGCTCTACCTCTTCG-3'     | 182 bp              |
| Toll-7 ( <i>Drosophila</i> ), Reverse       | 5'-TCGTTGGACCCCATTCACTG-3'     |                     |
| Toll-8/Tollo ( <i>Drosophila</i> ), Forward | 5'-CTCCCATGCTGGAAATGGGT-3'     | 188 bp              |
| Toll-8/Tollo ( <i>Drosophila</i> ), Reverse | 5'-CTGATGGGCGGACTTGAAC-3'      |                     |
| Toll-9 ( <i>Drosophila</i> ), Forward       | 5'-ATCGGATGATGGGAACAGTTGT-3'   | 100 bp              |
| Toll-9 ( <i>Drosophila</i> ), Reverse       | 5'-GTATTTCTTTGTGCTGTCCCTGA-3'  |                     |
| Drosomycin ( <i>Drosophila</i> ), Forward   | 5'-TACTTGTTCCGCCCTCTTCGC-3'    | 190 bp              |
| Drosomycin ( <i>Drosophila</i> ), Reverse   | 5'-CTTCGCACCAGCACTTCAGA-3'     |                     |
| Metchnikowin ( <i>Drosophila</i> ), Forward | 5'-TGCAACTTAATCTTGGAGCGA-3'    | 151 bp              |
| Metchnikowin ( <i>Drosophila</i> ), Reverse | 5'-ATTGGACCCGGTCTTGGTTG-3'     |                     |
| Defensin ( <i>Drosophila</i> ), Forward     | 5'-CCACATGCGACCTACTCTCC-3'     | 124 bp              |
| Defensin ( <i>Drosophila</i> ), Reverse     | 5'-AATCAATTGCGGCAAACGCA-3'     |                     |
| Cecropin A1 ( <i>Drosophila</i> ), Forward  | 5'-ATCAGTCGCTCAGACCTCAC-3'     | 157 bp              |
| Cecropin A1 ( <i>Drosophila</i> ), Reverse  | 5'-TTTCTTCAGCCACCCAGCTT-3'     |                     |
| Diptericin A ( <i>Drosophila</i> ), Forward | 5'-CACCGCAGTACCCACTCAAT-3'     | 184 bp              |
| Diptericin A ( <i>Drosophila</i> ), Reverse | 5'-CCACTTTCAGCTCGGTTCT-3'      |                     |
| Drosocin ( <i>Drosophila</i> ), Forward     | 5'-CTGCTTGCTTGCGTTTTTGC-3'     | 174 bp              |
| Drosocin ( <i>Drosophila</i> ), Reverse     | 5'-TCTTTAGGCGGGCAGAATGG-3'     |                     |
| Attacin-C ( <i>Drosophila</i> ), Forward    | 5'-CCCAACGTCCGTATACCCAG-3'     | 150 bp              |
| Attacin-C ( <i>Drosophila</i> ), Reverse    | 5'-AGTTCCAACGGCCTTGCTTA-3'     |                     |
| Jafrac2 ( <i>Drosophila</i> ), Forward      | 5'-CTACTTGGAGTCCAGCGGTC-3'     | 116 bp              |
| Jafrac2 ( <i>Drosophila</i> ), Reverse      | 5'-TAGTCTCGTCCACAGAGCGT-3'     |                     |

|                                        |                                |        |
|----------------------------------------|--------------------------------|--------|
| puc ( <i>Drosophila</i> ), Forward     | 5'-CCGGCGGTCTACGATATAGAA-3'    | 181 bp |
| puc ( <i>Drosophila</i> ), Reverse     | 5'-TGGCAGGTATTTGCATGTACTT-3'   |        |
| Thor ( <i>Drosophila</i> ), Forward    | 5'-CTCCTGGAGGCACCAAACCTTATC-3' | 111 bp |
| Thor ( <i>Drosophila</i> ), Reverse    | 5'-TTCCCCTCAGCAAGCAACTG-3'     |        |
| PHGPx ( <i>Drosophila</i> ), Forward   | 5'-ACCTAAAGGCCAAGCAGACC-3'     | 105 bp |
| PHGPx ( <i>Drosophila</i> ), Reverse   | 5'-TCGGGGCATATCGGTTGATG-3'     |        |
| Cyp4p3 ( <i>Drosophila</i> ), Forward  | 5'-TGGCTCGTGGGAGCTTTTATT-3'    | 141 bp |
| Cyp4p3 ( <i>Drosophila</i> ), Reverse  | 5'-GCCCTTCACTAATGGAGCAATG-3'   |        |
| GstD2 ( <i>Drosophila</i> ), Forward   | 5'-AAGGATGACTATCTGTTGCCCA-3'   | 172 bp |
| GstD2 ( <i>Drosophila</i> ), Reverse   | 5'-CAAACGCGGTTTCGATTCTCT-3'    |        |
| GstE5 ( <i>Drosophila</i> ), Forward   | 5'-TTTGTGGAGACCTTCCTCGC-3'     | 155 bp |
| GstE5 ( <i>Drosophila</i> ), Reverse   | 5'-AAACGCCTGACCCATTCGAT-3'     |        |
| TotM ( <i>Drosophila</i> ), Forward    | 5'-CGACAGCCTGGTCACTTTCT-3'     | 172 bp |
| TotM ( <i>Drosophila</i> ), Reverse    | 5'-TAGCTTCACCACTGGCAACC-3'     |        |
| Hsp70Bc ( <i>Drosophila</i> ), Forward | 5'-ATTTGGCGGCTACTCTGGAC-3'     | 163 bp |
| Hsp70Bc ( <i>Drosophila</i> ), Reverse | 5'-ACAATGGGTTGCTAACATATGAGT-3' |        |
| p38b ( <i>Drosophila</i> ), Forward    | 5'-TGATGGACGCCGATCTGAAC-3'     | 175 bp |
| p38b ( <i>Drosophila</i> ), Reverse    | 5'-ATGCGAAGCTCACAGTCCTC-3'     |        |

\* Primer sequences from FlyPrimerBank (<https://www.flyrnai.org/flyprimerbank>).

\*\* Primer sequences from "Cell, 2013,155(3):699-712. doi: 10.1016/j.cell.2013.09.021."

\*\*\* Primer sequences from "PNAS, 2013, 110(19):E1752-60. doi: 10.1073/pnas.1306220110."
